# Supplementary material for: Simulation and prediction of the thermal sintering behavior for a silver nanoparticle ink based on experimental input
Source: Royal Society of Chemistry journal article supplement (doi:10.1039/c4tc00632a), 2014-01-01
Supplement: c4tc00632a1.pdf [file c4tc00632a1.pdf]

## Electronic Supplementary Information: Simulation and Prediction of the Thermal Sintering Behavior for a Silver Nanoparticle Ink Based on Experimental Input

Sebastian Wünscher,<sup>1,2,‡</sup> Tobias Rasp,<sup>3,‡</sup> Michael Grouchko,<sup>4</sup> Alexander Kamyshny,<sup>4</sup> Renzo M. Paulus,<sup>1,2</sup> Jolke Perelaer,<sup>1,2,5\*</sup> Torsten Kraft,<sup>3</sup> Shlomo Magdassi,<sup>4</sup> Ulrich S. Schubert<sup>1,2,5\*</sup>

1 Laboratory of Organic and Macromolecular Chemistry (IOMC), Friedrich Schiller University Jena, Humboldtstr. 10, 07743 Jena, Germany.

2 Jena Center for Soft Matter (JCSM), Friedrich Schiller University Jena, Philosophenweg 7, 07743 Jena, Germany.

3 Fraunhofer Institute for Mechanics of Materials (IWM), Wöhlerstraße 11, 79108 Freiburg, Germany.

4 Casali Institute for Applied Chemistry, Institute of Chemistry, The Hebrew University of Jerusalem, Jerusalem 91904, Israel.

5 Dutch Polymer Institute (DPI), P.O. Box 513, 5600 MB Eindhoven, The Netherlands.

‡ Both authors contributed equally to the presented work.

E-mail: ulrich.schubert@uni-jena.de, jolke.perelaer@uni-jena.de

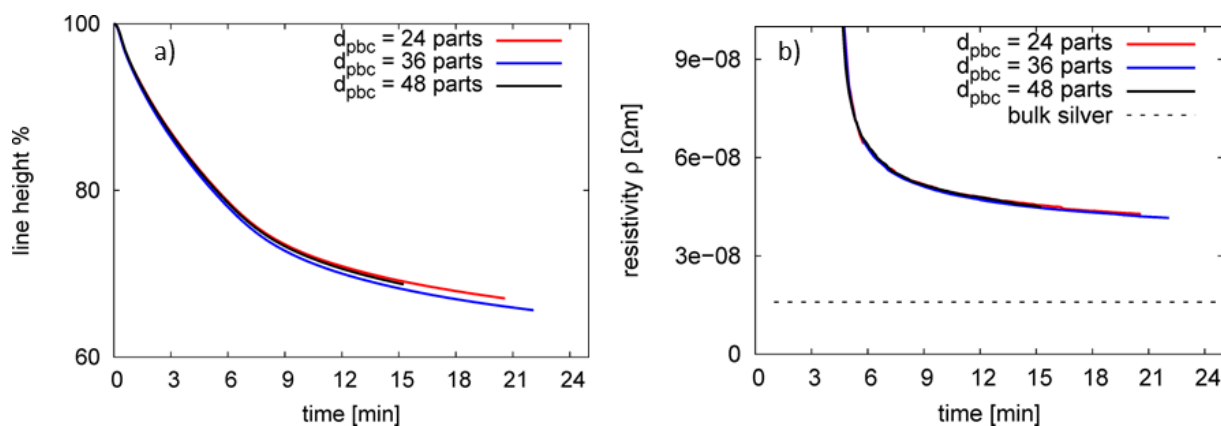

**ESI Figure 1.** Computed line height decrease (a) and resistivity development (b) for samples with varying sample length in lateral periodic direction  $d_{pbc}$  ranging from 24 x to 48 x particle diameter.

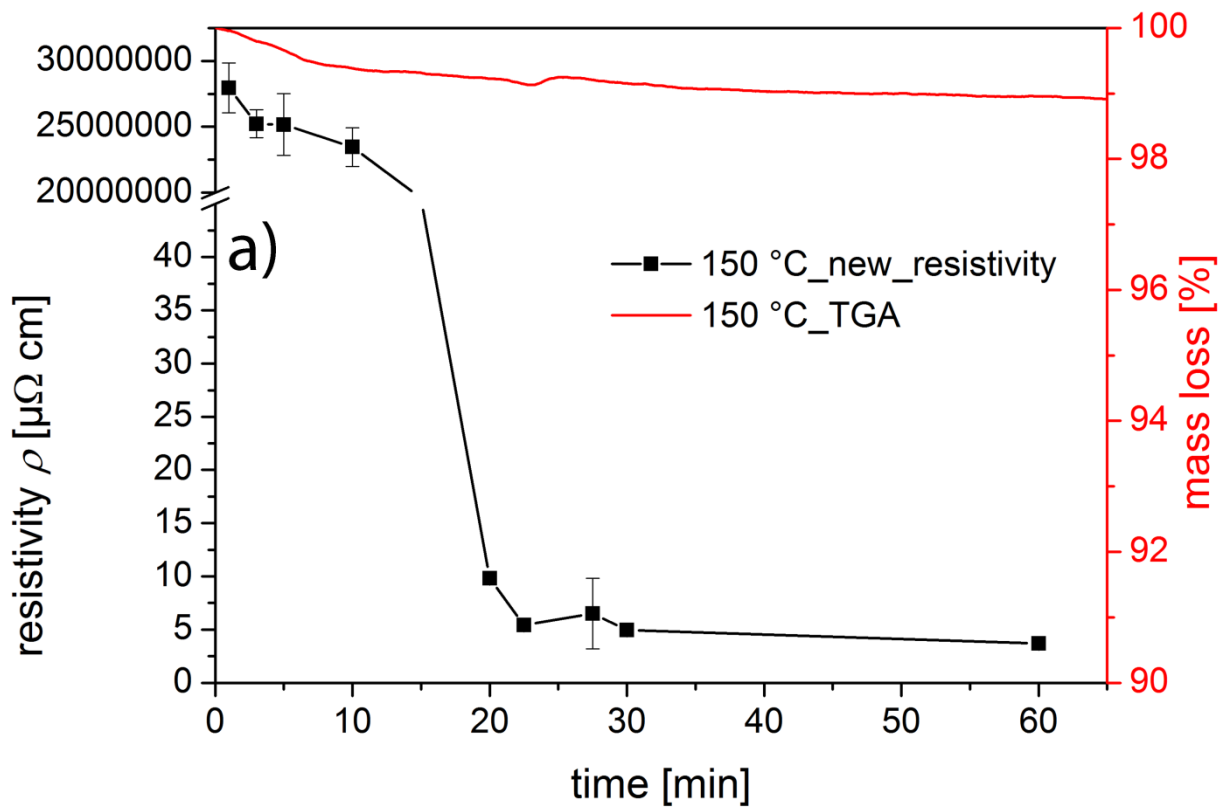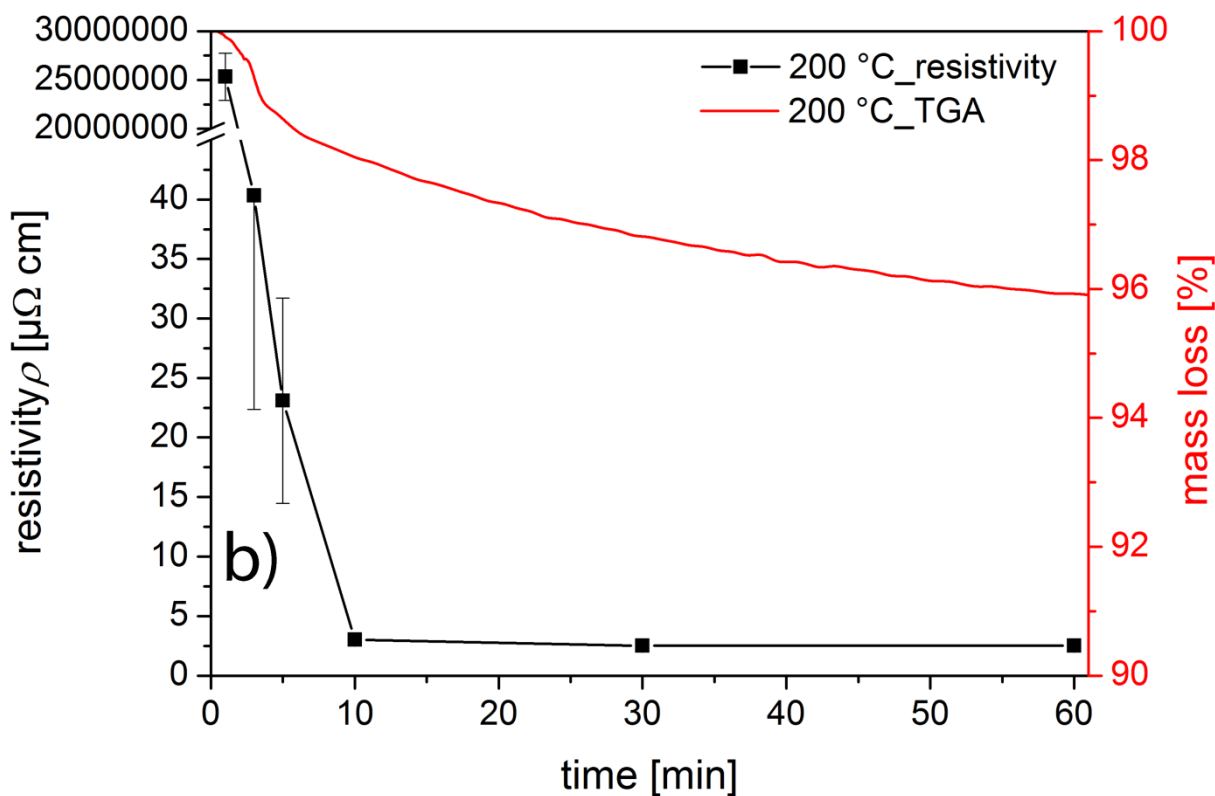

**ESI Figure 2.** Isothermal thermogravimetric analysis (TGA) of vacuum dried ink (red line) and resistivity ( $\rho$ ) development over sintering time ( $t$ ) (black line and squares) at a sintering temperature of 150 °C (a) and 200 °C (b).

**ESI Table 1.** Dedicated mass losses of the stabilizer from isothermal TGA and resistivity values of all temperatures at selected sintering times.

|               | Mass loss stabilizer / % |        |        | $\rho / \mu\Omega \text{ cm}$ |        |        |
|---------------|--------------------------|--------|--------|-------------------------------|--------|--------|
|               | 150 °C                   | 175 °C | 200 °C | 150 °C                        | 175 °C | 200 °C |
| <b>5 min</b>  | 3.3                      | 5.4    | 13.1   | $2.5 \times 10^7$             | 8.7    | 23.1   |
| <b>10 min</b> | 6.0                      | 6.6    | 18.9   | $2.3 \times 10^7$             | 4.2    | 3.0    |
| <b>30 min</b> | 8.3                      | 12.0   | 30.9   | 5.0                           | 4.0    | 2.5    |
